# Supplementary material for: Mixed-solvent liquid exfoliated MoS2NPs as peroxidase mimetics for colorimetric detection of H2O2and glucose
Source: Royal Society of Chemistry journal article supplement (doi:10.1039/c7ra12584d), 2018-01-01
Supplement: c7ra12584d1.pdf [file c7ra12584d1.pdf]

## Electric Supplementary Material

### **A mixed-solvent Liquid exfoliated MoS<sub>2</sub> nanoparticles as peroxidase mimetics for colorimetric detection of H<sub>2</sub>O<sub>2</sub> and glucose**

Yuehua Zhao<sup>a,b,#</sup>, Yu Huang<sup>a,#,\*</sup>, Jiangling Wu<sup>c</sup>, Xiaoli Zhan<sup>d</sup>, Yuanyang Xie<sup>a,b</sup>, Dongyun Tang<sup>a</sup>, Haiyan Cao<sup>e,\*</sup>, Wen Yun<sup>f,\*</sup>

<sup>a</sup> *Chongqing Institute of Green and Intelligent Technology, Chinese Academy of Sciences, Chongqing, 400714, China*

<sup>b</sup> *University of Chinese Academy of Science, Beijing, 100049, China*

<sup>c</sup> *University-Town Hospital of Chongqing Medical University, Chongqing, 401331, China*

<sup>d</sup> *Chongqing Traditional Chinese Medicine Hospital, Chongqing, 400021, China*

<sup>e</sup> *School of Chemistry and Chemical Engineering, Yangtze Normal University, 408100, Chongqing, China*

<sup>f</sup> *Chongqing Key Laboratory of Catalysis and Functional Organic Molecules, College of Environment and Resources, Chongqing Technology and Business University, Chongqing, 400067, China*

*# These authors contributed equally to this work*

\*Corresponding author email address: huangyu@cigit.ac.cn (Yu Huang), 513923170@qq.com (Haiyan Cao), yunwenyunwen@126.com (Wen Yun)

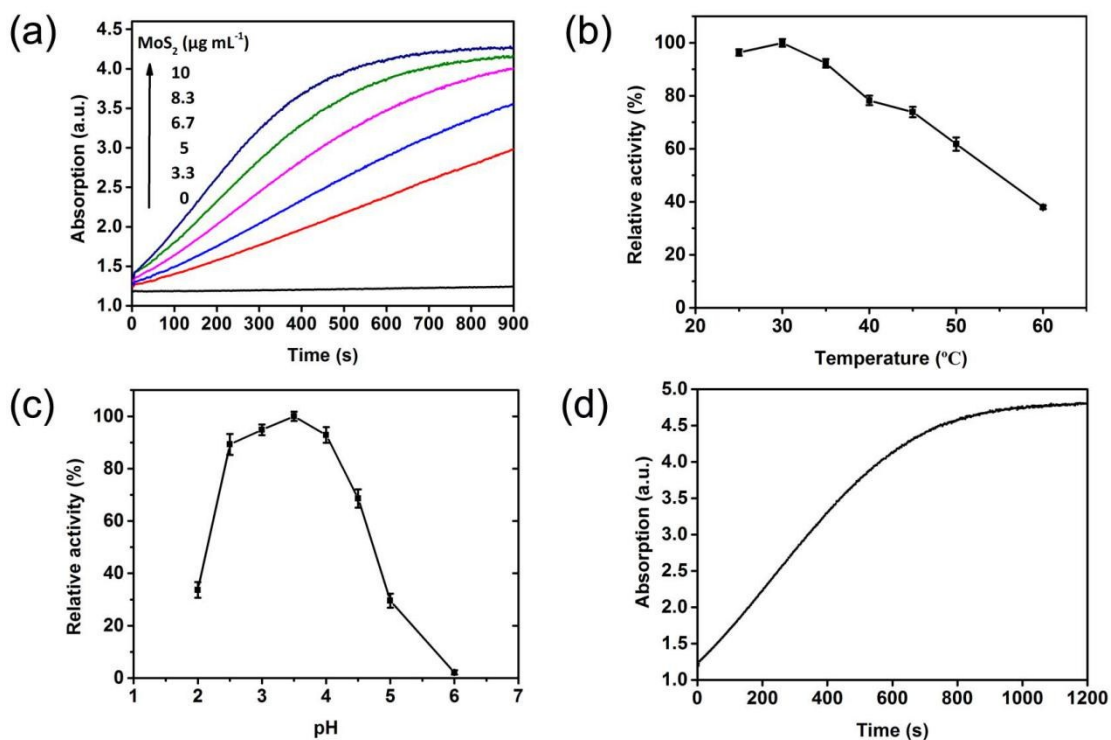

**Fig.S1** (a) The time-dependent absorption changes at 656 nm in the presence of different concentrations of MoS<sub>2</sub> NPs in HAc-NaAc buffer (pH 4.0) at 40 $^{\circ}\text{C}$  with 0.8 mM TMB and 0.04 mM H<sub>2</sub>O<sub>2</sub> for 15 min .

Effect of temperature (Fig.S1(b)) and pH (Fig.S1(c)) on the catalytic activity of MoS<sub>2</sub> NPs.

Reaction condition of (b) : 300  $\mu\text{L}$  MoS<sub>2</sub> NPs (100  $\mu\text{g mL}^{-1}$ ) + 300  $\mu\text{L}$  TMB(8 mM )+ 300  $\mu\text{L}$  H<sub>2</sub>O<sub>2</sub> (0.4 mM) + 2100  $\mu\text{L}$  HAc-NaAc buffer (pH 4.0).

Reaction condition of (c) : 300 $\mu\text{L}$  MoS<sub>2</sub> NPs (100  $\mu\text{g mL}^{-1}$ ) + 300  $\mu\text{L}$  TMB(8 mM)+ 300  $\mu\text{L}$  H<sub>2</sub>O<sub>2</sub> (0.4 mM) + 2100  $\mu\text{L}$  HAc-NaAc buffer (different pH values).

The error bars represent the standard deviation of three measurements.

Fig.S1(d) The effect of reaction time on the catalytic activity of MoS<sub>2</sub> NPs. The experiment was carried out using 10 $\mu\text{g mL}^{-1}$  MoS<sub>2</sub> NPs in a reaction volume of 3 mL, in HAc-NaAc buffer (pH 3.5) with 0.8 mM TMB and 0.04 mM H<sub>2</sub>O<sub>2</sub> for 20 min at 30 $^{\circ}\text{C}$ .

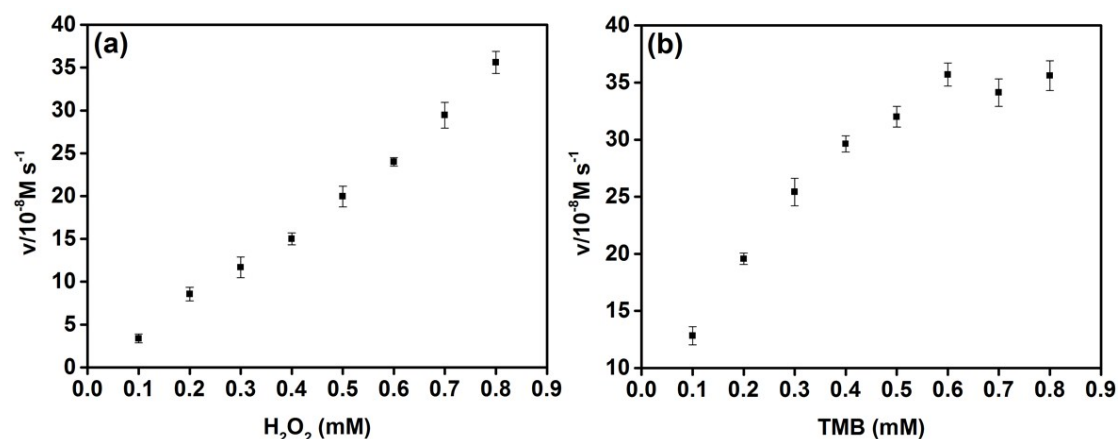

**Fig.S2** Steady-state kinetic assay of HRP. The velocity ( $v$ ) of the reaction was measured using HRP ( $5 \mu\text{g L}^{-1}$ ) in 3 mL of acetate buffer solution (0.2M, pH = 3.5) at 30 °C. (a) The concentration of TMB was 0.8mM and the  $\text{H}_2\text{O}_2$  concentration was varied. (b) The concentration of  $\text{H}_2\text{O}_2$  was 0.8mM and the TMB concentration was varied.

**Table.S1** Comparison of the kinetic parameters of  $\text{MoS}_2$  NPs and HRP.  $K_m$  is the Michaelies constant,  $V_{\max}$  is the maximal reaction velocity.

| Catalyst           | Substrate              | $K_m$ (mM) | $V_{\max}$ ( $10^{-8}\text{M s}^{-1}$ ) |
|--------------------|------------------------|------------|-----------------------------------------|
| $\text{MoS}_2$ NPs | $\text{H}_2\text{O}_2$ | 0.1355     | 28.4                                    |
| $\text{MoS}_2$ NPs | TMB                    | 2.5324     | 58.9                                    |
| HRP                | $\text{H}_2\text{O}_2$ | 2.5547     | 85.5                                    |
| HRP                | TMB                    | 0.2934     | 50.1                                    |

**Table.S2** Comparison of various colorimetric methods for detection of  $\text{H}_2\text{O}_2$ .

| Materials                               | LOD( $\mu\text{M}$ ) | Linear range(M)                           | Reference |
|-----------------------------------------|----------------------|-------------------------------------------|-----------|
| $\text{Fe}_3\text{O}_4$ MNPs            | 3                    | $5 \times 10^{-6}$ - $1 \times 10^{-4}$   | 1         |
| Positively charged AuNPs                | 0.5                  | $2 \times 10^{-6}$ - $2 \times 10^{-4}$   | 2         |
| SDS- $\text{MoS}_2$ NPs                 | 0.32                 | $2 \times 10^{-6}$ - $1 \times 10^{-4}$   | 3         |
| $\text{MoS}_2/\text{PPy}$ Nanocomposite | 45                   | $50 \times 10^{-6}$ - $2 \times 10^{-3}$  | 4         |
| $\text{MoS}_2$ nanosheets               | 1.5                  | $5 \times 10^{-6}$ - $1 \times 10^{-4}$   | 5         |
| $\text{MoS}_2$ NPs                      | 1.25                 | $3 \times 10^{-6}$ - $1.2 \times 10^{-4}$ | This work |

**Table.S3** Comparison of various colorimetric methods for detection of glucose.

| Materials                    | LOD( $\mu\text{M}$ ) | Linear range(M)                              | Reference |
|------------------------------|----------------------|----------------------------------------------|-----------|
| $\text{Fe}_3\text{O}_4$ MNPs | 30                   | $50 \times 10^{-6}$ - $10 \times 10^{-4}$    | 1         |
| Positively charged AuNPs     | 4                    | $18 \times 10^{-6}$ - $11 \times 10^{-4}$    | 2         |
| SDS - $\text{MoS}_2$ NPs     | 0.57                 | $5 \times 10^{-6}$ - $5 \times 10^{-4}$      | 3         |
| PVP - $\text{MoS}_2$ NPs     | 320                  | $1000 \times 10^{-6}$ - $100 \times 10^{-4}$ | 6         |
| $\text{MoS}_2$ nanosheets    | 1.2                  | $5 \times 10^{-6}$ - $1.5 \times 10^{-4}$    | 5         |
| $\text{MoS}_2$ NPs           | 7                    | $15 \times 10^{-6}$ - $1.35 \times 10^{-4}$  | This work |

**Table.S4** Detection results of  $\text{H}_2\text{O}_2$  after adding different concentrations of  $\text{H}_2\text{O}_2$  into known concentration of  $\text{H}_2\text{O}_2$ 

| Sample number | Content ( $\mu\text{M}$ ) | Added ( $\mu\text{M}$ ) | Measured ( $\mu\text{M}$ ) | Recovery (% $_{,n=3}$ ) | RSD (% $_{,n=3}$ ) |
|---------------|---------------------------|-------------------------|----------------------------|-------------------------|--------------------|
| 1             | 5                         | 5                       | 9.83                       | 98.3                    | 4.8                |
| 2             | 5                         | 35                      | 38.76                      | 96.9                    | 6.3                |
| 3             | 5                         | 75                      | 77.21                      | 96.5                    | 5.6                |

**Table.S5** Detection results of glucose after adding different concentrations of glucose into known concentration of glucose

| Sample number | Content ( $\mu\text{M}$ ) | Added ( $\mu\text{M}$ ) | Measured ( $\mu\text{M}$ ) | Recovery (% $_{,n=3}$ ) | RSD (% $_{,n=3}$ ) |
|---------------|---------------------------|-------------------------|----------------------------|-------------------------|--------------------|
| 1             | 10                        | 10                      | 19.12                      | 95.6                    | 5.3                |
| 2             | 10                        | 50                      | 58.68                      | 97.8                    | 6.7                |
| 3             | 10                        | 90                      | 97.1                       | 97.1                    | 6.4                |

**Table.S6** Influence of foreign substances on the detection of 40  $\mu\text{M}$   $\text{H}_2\text{O}_2$  using the proposed method.

| Foreign substance      | Concentration (mM) | Change in absorption signal (%) <sup>n</sup> |
|------------------------|--------------------|----------------------------------------------|
| NaCl                   | 500                | +5.2                                         |
| KCl                    | 500                | +4.9                                         |
| $\text{NH}_4\text{Cl}$ | 500                | +3.1                                         |
| $\text{CaCl}_2$        | 100                | +3.8                                         |
| $\text{MgCl}_2$        | 100                | +3.3                                         |
| $\text{BaCl}_2$        | 100                | +4.4                                         |
| $\text{NiCl}_2$        | 100                | +4.9                                         |
| Glucose                | 20                 | -5.5                                         |
| Tryptophan             | 5                  | -4.6                                         |
| NaClO                  | 0.1                | +5.9                                         |

<sup>n</sup>The average value of five experiments

**Table.S7** Results of determination of glucose in human serum samples (n=3).

| Sample number | Glucometer method (mM) | Proposed method (mM)         | RSD (%) |
|---------------|------------------------|------------------------------|---------|
| 1             | 5.6                    | $5.17 \pm 0.06$ <sup>n</sup> | -7.7%   |
| 2             | 6.4                    | $6.03 \pm 0.05$ <sup>n</sup> | -5.8%   |
| 3             | 7.7                    | $7.16 \pm 0.05$ <sup>n</sup> | -7.0%   |

## References

1. H. Wei and E. Wang, *Anal. Chem.*, 2008, **80**, 2250.
2. Y. Jv, B. Li and R. Cao, *Chem. Commun.*, 2010, **46**, 8017.
3. K. Zhao, W. Gu, S. Zheng, C. Zhang and Y. Xian, *Talanta*, 2015, **141**, 47.
4. J. Lei, X. Lu, G. Nie, Z. Jiang and C. Wang, *Part. Part. Syst. Char.*, 2015, **32**, 886.
5. T. Lin, L. Zhong, L. Guo, F. Fu and G. Chen, *Nanoscale*, 2014, **6**, 11856.
6. J. Yu, X. Ma, W. Yin and Z. Gu, *RSC Adv.*, 2016, **6**, 81174.
